# Supplementary material
Source: ML conference proceedings conference paper supplement (https://proceedings.neurips.cc/paper_files/paper/2024/hash/d64a008c2fa8392afaa7d7036a017042-Abstract.html)

$x=0.17$

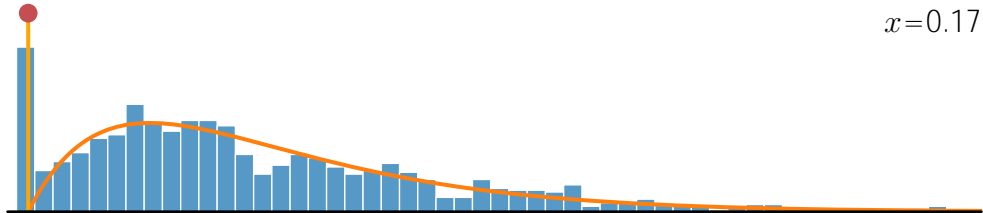

$x=0.5$

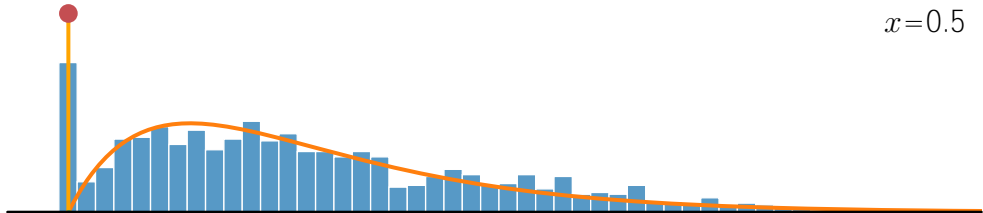

$x=0.83$

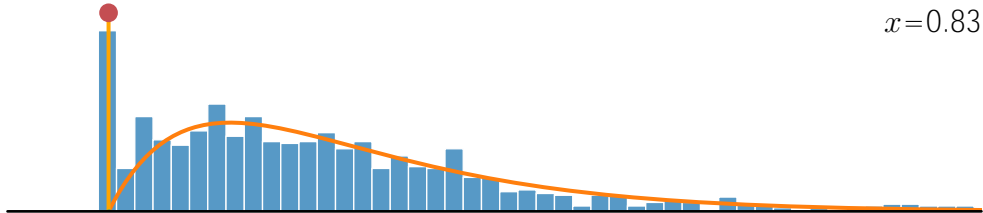

0

1

2

3

4

5

6

7

8

$y$

Supplement: Supplementary file 1 [file d64a008c2fa8392afaa7d7036a017042-Supplemental-Conference.zip]

$x = 0.17$

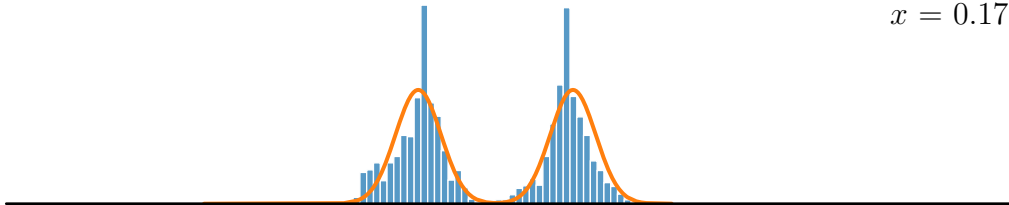

$x = 0.5$

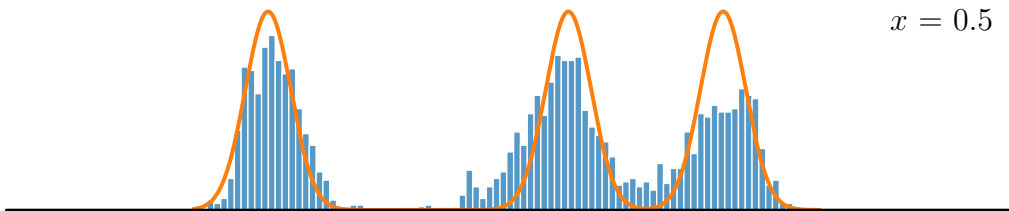

$x = 0.83$

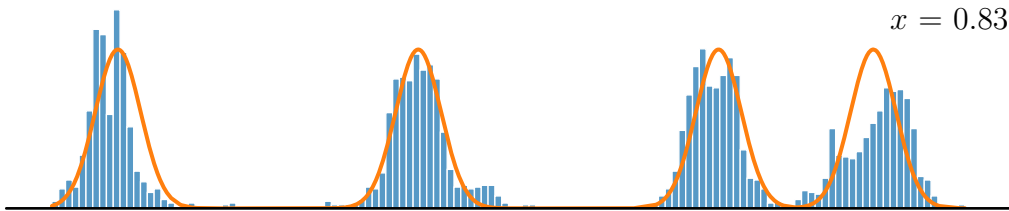

1.00 0.75 0.50 0.25 0.00 0.25 0.50 0.75 1.00

$y$

Supplement: Supplementary file 2 [file d64a008c2fa8392afaa7d7036a017042-Supplemental-Conference.zip]

$x = 0.17$

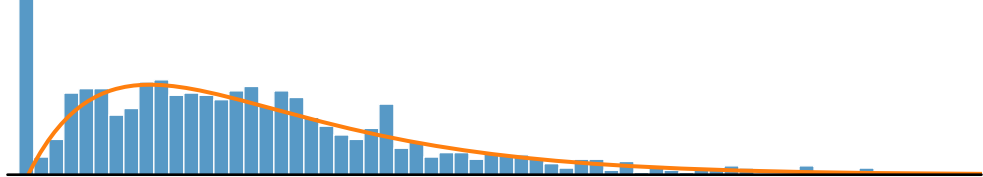

$x = 0.5$

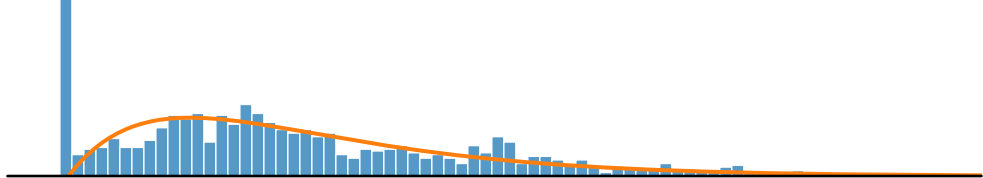

$x = 0.83$

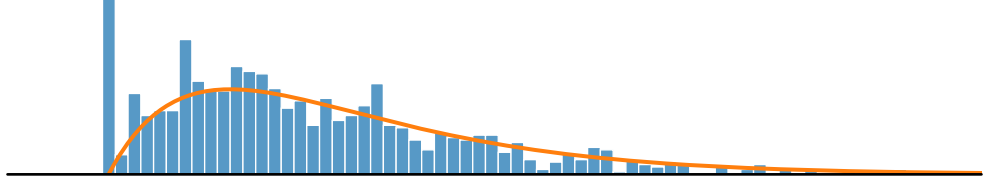

0

1

2

3

4

5

6

7

8

$y$

Supplement: Supplementary file 4 [file d64a008c2fa8392afaa7d7036a017042-Supplemental-Conference.zip]
